# Supplementary material for: The development of support intuitions and object causality in juvenile Eurasian jays (Garrulus glandarius)
Source: PubMed Central journal article supplement (PMC5215467; doi:10.1038/srep40062), 2017-01-05
Supplement: srep40062-s3.pdf [file srep40062-s3.pdf]

1 **The development of support intuitions and object causality in juvenile Eurasian jays**  
2 **(*Garrulus glandarius*)**

3 Gabrielle Davidson<sup>\*,a,b</sup>, Rachael Miller<sup>a</sup>, Elsa Loissel<sup>a</sup>, Lucy G. Cheke<sup>a</sup>, Nicola S. Clayton<sup>a</sup>

4  
5 **Supplementary Information**

6  
7 *Associative learning task*

8  
9 Birds were presented with two objects located behind two small Perspex windows covered by a large curtain and  
10 could make a choice by flying to one of the two perches located below each window. The experimenter was out  
11 of sight behind the curtain where they moved the location of the objects (randomised across trials), raised the  
12 curtain and rewarded the birds with wax worms (rewarded object counterbalanced across birds). The  
13 experimenter monitored the birds from behind the curtain via a live video feed using a GoPro® Hero4 Black. The  
14 task consisted of three training phases (baited, multiple choices and first choice) and one test phase (live and  
15 monitor).

16  
17 *Training phase 1 (baited)*: Birds were trained to wait at a perch 1 metre away from the windows when the curtains  
18 were closed. The experimenter raised the curtain and held a worm in front of the rewarded object and the birds  
19 could fly to the perch and obtain their reward. The curtain was closed and this was repeated 10 times over 3  
20 sessions. A maximum of two sessions were given per day, with a minimum two hour interval between.

21  
22 *Training phase 2 (multiple choices)*: This phase followed a similar procedure as the baited phase; however, birds  
23 were only presented with the reward once they landed on the “correct” perch, regardless of any mistakes. Once  
24 the bird landed on the correct perch, the experimenter presented a worm and closed the curtain. Birds received  
25 10 trials over 4 sessions.

26  
27 *Training phase 3 (single choice)*: The curtain was raised and birds were given one choice. If they landed on the  
28 correct perch, they received a worm. If they landed on the incorrect perch the curtain was lowered without  
29 reward. Birds received 10 trials per session. In order to reach criterion and move to the test phase, birds had to  
30 choose correctly 8/10 trials over two consecutive sessions.

31  
32 *Test phase (live and monitor)*: We tested whether birds would choose the correct perch when presented with  
33 objects displayed on the monitor. The set up was the same as in training phase 3, with a monitor positioned  
34 directly behind the live objects. Birds were given four choices with the live objects (monitor as a black screen).  
35 Birds were rewarded for each correct choice to prevent extinction of the learned association. If birds did not  
36 choose all four live objects correctly, the test phase was repeated the following session. If birds chose correctly  
37 all four times, the live objects were removed and the birds were presented with one single choice of the objects  
38 displayed on the monitor.

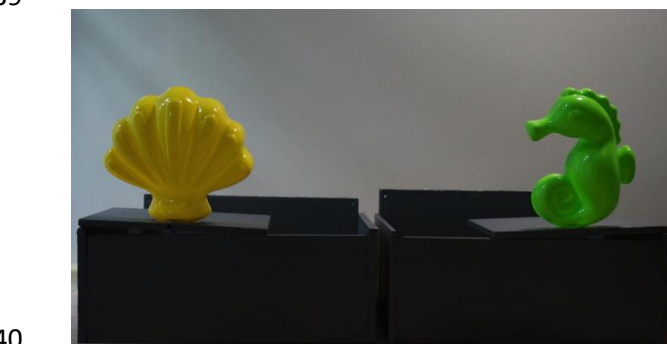

40  
41 **Supplemental Figure S1.** Two objects (yellow clam shell and green sea horse) were revealed to the birds  
42 through two separate windows. Images of the same objects were displayed on a monitor in front of the same two  
43 windows during the test phase.

44  
45 **Supplemental Tables S1-S3.** Bird participation for each developmental stage and for each stimulus.

46

| Stimulus type         | age (months) | Total stimuli | Total subjects | All stimuli | less 1 | less 2 | less 3 | less 4 | less 5 |
|-----------------------|--------------|---------------|----------------|-------------|--------|--------|--------|--------|--------|
| Videos                | 3            | 82            | 15             | 10          | 3      | 1      | 1      | x      | x      |
| Videos                | 4            | 57            | 13             | 7           | x      | 1      | 2      | 2      | 1      |
| Videos                | 6            | 70            | 14             | 7           | 3      | 2      | 1      | 1      | x      |
| Videos                | 9            | 45            | 10             | 3           | 2      | 1      | 3      | 2      | x      |
| Images                | 3            | 59            | 16             | 13          | 2      | x      | 1      | x      | x      |
| Images (string group) | 6            | 47            | 7              | 4           | 3      | x      | x      | x      | x      |
| Images (nail group)   | 6            | 51            | 8              | 4           | 3      | 1      | x      | x      | x      |

47 **Supplemental Table S1:** Total number of test stimuli (images or videos) and number of subjects at each age  
48 group. Number of subjects to have viewed all stimuli (images or videos), or less than all stimuli (minus 1,2, 3, 4,  
49 or 5 from total stimuli).

50 **Supplemental Table S2:** Number of subject participation per video stimulus and developmental stage.

| Age (months) | contact push | contact pull | incorrect contact push | incorrect contact pull | no contact push | no contact pull | Mean participation |
|--------------|--------------|--------------|------------------------|------------------------|-----------------|-----------------|--------------------|
| 3            | 14           | 14           | 14                     | 14                     | 11              | 15              | 13.7               |
| 4            | 8            | 9            | 11                     | 9                      | 11              | 9               | 9.5                |
| 6            | 10           | 13           | 11                     | 11                     | 12              | 13              | 11.7               |
| 9            | 7            | 7            | 8                      | 9                      | 7               | 7               | 7.5                |

52  
53  
54

**Supplemental Table S3:** Number of subject participation per image stimulus and developmental stage.

| Stimulus type         | Age (months) | support | insufficient support    | no support              | incorrect support | Mean          |                      |                      |     |
|-----------------------|--------------|---------|-------------------------|-------------------------|-------------------|---------------|----------------------|----------------------|-----|
| images                | 3            | 15      | 15                      | 14                      | 15                | 14.75         |                      |                      |     |
|                       |              | support | insufficient support SU | insufficient support SD | no support SU     | no support SD | incorrect support SU | incorrect support SD |     |
| images (string group) | 6            | 7       | 7                       | 7                       | 7                 | 7             | 7                    | 5                    | 6.6 |
| images (nail group)   | 6            | 8       | 8                       | 6                       | 6                 | 8             | 7                    | 8                    | 7.1 |

55  
56  
57  
58

**Supplemental Tables S4-S5 Results tables for GLMMs**

| Model                        | subjects | total observations | Fixed effects       | $\beta \pm SE$ | z     | P       |
|------------------------------|----------|--------------------|---------------------|----------------|-------|---------|
| Cheese outside minimal model | 15       | 124                | intercept           | 7.28±0.19      | 37.72 | <0.0001 |
|                              |          |                    | presentation order  | -              | -4.69 | <0.0001 |
|                              |          |                    | age 9 months        | 0.14±0.03      | -3.93 | <0.0001 |
|                              |          |                    | no contact*9 months | -1±0.25        | 2.84  | 0.005   |
|                              |          |                    | no contact          | 1.03±0.36      | -2.44 | 0.015   |
|                              |          |                    |                     | 0.52±0.21      |       |         |

|                                    |    |     |                     |           |       |         |
|------------------------------------|----|-----|---------------------|-----------|-------|---------|
|                                    |    |     | incorrect*4 months  | -         | -1.75 | 0.080   |
|                                    |    |     |                     | 0.58±0.33 |       |         |
|                                    |    |     | incorrect contact   | 0±0.2     | -0.02 | 0.986   |
|                                    |    |     | age 4 months        | -         | -0.24 | 0.814   |
|                                    |    |     |                     | 0.06±0.23 |       |         |
|                                    |    |     | age 6 months        | -         | -1.00 | 0.316   |
|                                    |    |     |                     | 0.22±0.22 |       |         |
|                                    |    |     | no contact*4 months | 0.38±0.33 | 1.15  | 0.249   |
|                                    |    |     | incorrect*6 months  | 0.25±0.31 | 0.82  | 0.414   |
|                                    |    |     | no contact*6 months | 0.36±0.32 | 1.14  | 0.253   |
|                                    |    |     | incorrect*9 months  | 0.18±0.35 | 0.52  | 0.600   |
| <b>Cheese inside minimal model</b> | 15 | 130 | intercept           | 7.16±0.14 | 52.37 | <0.0001 |
|                                    |    |     | age 4 months        | -         | -2.57 | 0.010   |
|                                    |    |     |                     | 0.33±0.13 |       |         |
|                                    |    |     | age 6 months        | -         | -1.94 | 0.052   |
|                                    |    |     |                     | 0.23±0.12 |       |         |
|                                    |    |     | age 9 months        | -         | -6.44 | <0.0001 |
|                                    |    |     |                     | 0.93±0.13 |       |         |
|                                    |    |     | presentation order  | -0.1±0.03 | -3.71 | 0.0002  |
| <b>dropped terms</b>               |    |     | incorrect contact   | 0.04±0.11 | 0.35  | 0.728   |
|                                    |    |     | no contact          | -         | -0.22 | 0.829   |
|                                    |    |     |                     | 0.02±0.11 |       |         |
|                                    |    |     | incorrect*4 months  | 0.11±0.3  | 0.38  | 0.707   |
|                                    |    |     | no contact*4 months | -         | -1.55 | 0.121   |
|                                    |    |     |                     | 0.48±0.31 |       |         |
|                                    |    |     | incorrect*6 months  | 0.14±0.28 | 0.50  | 0.617   |
|                                    |    |     | no contact*6 months | -         | -0.59 | 0.555   |
|                                    |    |     |                     | 0.16±0.28 |       |         |
|                                    |    |     | incorrect*9 months  | 0.07±0.33 | 0.21  | 0.833   |
|                                    |    |     | no contact*9 months | -         | -1.59 | 0.113   |
|                                    |    |     |                     | 0.53±0.33 |       |         |

59 Supplemental Table S4 GLMM output for looking time of video stimuli. Contact and age 3 months were  
60 set as reference categories.  
61

| Model                            | Subjects | Total observations | Fixed effects            | $\beta \pm SE$ | z     | P      |
|----------------------------------|----------|--------------------|--------------------------|----------------|-------|--------|
| <b>Core knowledge (3 months)</b> | 16       | 59                 | intercept                | 7.56±0.16      | 37.38 | <0.001 |
| <b>Minimal Model</b>             |          |                    | presentation order       | -              | -4.88 | <0.001 |
|                                  |          |                    |                          | 0.29±0.06      |       |        |
| <b>dropped terms</b>             |          |                    | insufficient support     | 0.12±0.2       | 0.61  | 0.54   |
|                                  |          |                    | no support               | -0.11±0.2      | -0.57 | 0.57   |
|                                  |          |                    | incorrect support        | -              | 0.22  | 0.83   |
|                                  |          |                    |                          | 0.29±0.06      |       |        |
|                                  |          |                    |                          | ±              |       |        |
| <b>Nail group (6 months)</b>     | 15       | 98                 | intercept                | 6.7±0.21       | 32.01 | <0.001 |
| <b>Minimal Model</b>             |          |                    | no support string down   | 0.53±0.26      | 2.03  | 0.043  |
|                                  |          |                    | insufficient string down | 0.56±0.28      | 2.00  | 0.045  |
|                                  |          |                    | incorrect string down    | 0.35±0.26      | 1.37  | 0.169  |
|                                  |          |                    | incorrect string up      | -              | -0.59 | 0.558  |
|                                  |          |                    |                          | 0.16±0.27      |       |        |

|                                |    |    |                          |           |       |        |
|--------------------------------|----|----|--------------------------|-----------|-------|--------|
|                                |    |    | insufficient string up   | -0.1±0.26 | -0.39 | 0.696  |
|                                |    |    | no support string up     | -         | -0.18 | 0.855  |
|                                |    |    |                          | 0.05±0.28 |       |        |
| <b>dropped terms</b>           |    |    | presentation order       | -         | -1.46 | 0.145  |
|                                |    |    |                          | 0.05±0.03 |       |        |
| <b>String group (6 months)</b> | 15 | 98 | intercept                | 6.96±0.21 | 33.52 | <0.001 |
| <b>Minimal Model</b>           |    |    | no support string up     | 0.56±0.28 | 1.99  | 0.046  |
|                                |    |    | insufficient string up   | 0.53±0.28 | 1.89  | 0.058  |
|                                |    |    | incorrect string down    | -         | -1.19 | 0.232  |
|                                |    |    |                          | 0.38±0.31 |       |        |
|                                |    |    | incorrect string up      | 0.34±0.28 | 1.21  | 0.227  |
|                                |    |    | insufficient string down | 0.07±0.28 | 0.24  | 0.813  |
|                                |    |    | no support string down   | -         | -0.16 | 0.876  |
|                                |    |    |                          | 0.04±0.28 |       |        |
| <b>dropped terms</b>           |    |    | presentation order       | -         | -0.31 | 0.754  |
|                                |    |    |                          | 0.01±0.04 |       |        |

62 **Supplemental Table S5 GLMM output for looking time of image stimuli. Contact (control) was set as the**  
63 **reference category.**

64  
65

#### 66 **Video Legends**

67

68 **Video 1.** Familiarisation video and six test videos: familiarisation video, contact push, contact pull, incorrect  
69 contact push, incorrect contact pull, no contact push, no contact pull. Rake direction (right to left or left to right)  
70 was consistent within individuals and counterbalanced across subjects. Video is edited from original format  
71 displayed to birds.

72

73 **Video 2.** Bird looking behaviour. A bird looks through the peep hole to the stimulus on the other side.  
74
